# Supplementary material for: Probability-based algorithm using ultrasound and additional tests for suspected GCA in a fast-track clinic
Source: PubMed Central journal article supplement — RMD Open. 2020 Sep 29;6(3):e001297. doi: 10.1136/rmdopen-2020-001297 (PMC7547539; doi:10.1136/rmdopen-2020-001297), 2020-09-29
Supplement: rmdopen-2020-001297s005.pdf [file rmdopen-2020-001297s005.pdf]

**Supplementary Table-1. Categories, ultrasound findings and statistics: only patients had Ultrasound**

| GCA Risk category (n)     | Vascular US | Final diagnosis |             | Sensitivity % [95% CI] | Specificity % [95% CI] | PPV % [95% CI] | NPV % [95% CI] | Prevalence % [95% CI] | Accuracy % [95% CI] | LR+ [95% CI]       | LR- [95% CI]     |
|---------------------------|-------------|-----------------|-------------|------------------------|------------------------|----------------|----------------|-----------------------|---------------------|--------------------|------------------|
|                           |             | GCA (n)         | Non-GCA (n) |                        |                        |                |                |                       |                     |                    |                  |
| <b>High (62)</b>          | Positive    | 50              | 2           | 94 [84,99]             | 78 [40,97]             | 96 [88,99]     | 70 [42,88]     | 85 [74,93]            | 92 [82,97]          | 4.25 [1.25,14.44]  | 0.07 [0.02,0.23] |
|                           | Negative    | 3               | 7           |                        |                        |                |                |                       |                     |                    |                  |
| <b>Intermediate (107)</b> | Positive    | 36              | 3           | 100 [90,100]           | 96 [88,99]             | 92 [80,97]     | 100            | 34 [25,43]            | 97 [92,99]          | 23.67 [7.82,71.63] | 0.00             |
|                           | Negative    | 0               | 68          |                        |                        |                |                |                       |                     |                    |                  |
| <b>Low (81)</b>           | Positive    | 0               | 3           | (undefined)            | 96 [90,99]             | 0              | 100            | 0                     | 96                  | -                  | -                |
|                           | Negative    | 0               | 78          |                        |                        |                |                |                       |                     |                    |                  |
| <b>Total (250)</b>        | Positive    | 86              | 8           | 97 [90,99]             | 95 [90,98]             | 91 [85,5]      | 98 [94,99]     | 36 [30,42]            | 96 [92,98]          | 19.45 [9.89,38.26] | 0.04 [0.01,0.11] |
|                           | Negative    | 3               | 153         |                        |                        |                |                |                       |                     |                    |                  |

*GCA, Giant cell arteritis; LR+, Positive likelihood ratio; LR-, Negative likelihood ratio NPV, negative predictive value; PPV, positive predictive value; US, ultrasound*
