# Supplementary figures and images for: Probability-based algorithm using ultrasound and additional tests for suspected GCA in a fast-track clinic
Source: PubMed Central journal article supplement — RMD Open. 2020 Sep 29;6(3):e001297. doi: 10.1136/rmdopen-2020-001297 (PMC7547539; doi:10.1136/rmdopen-2020-001297), 2020-09-29

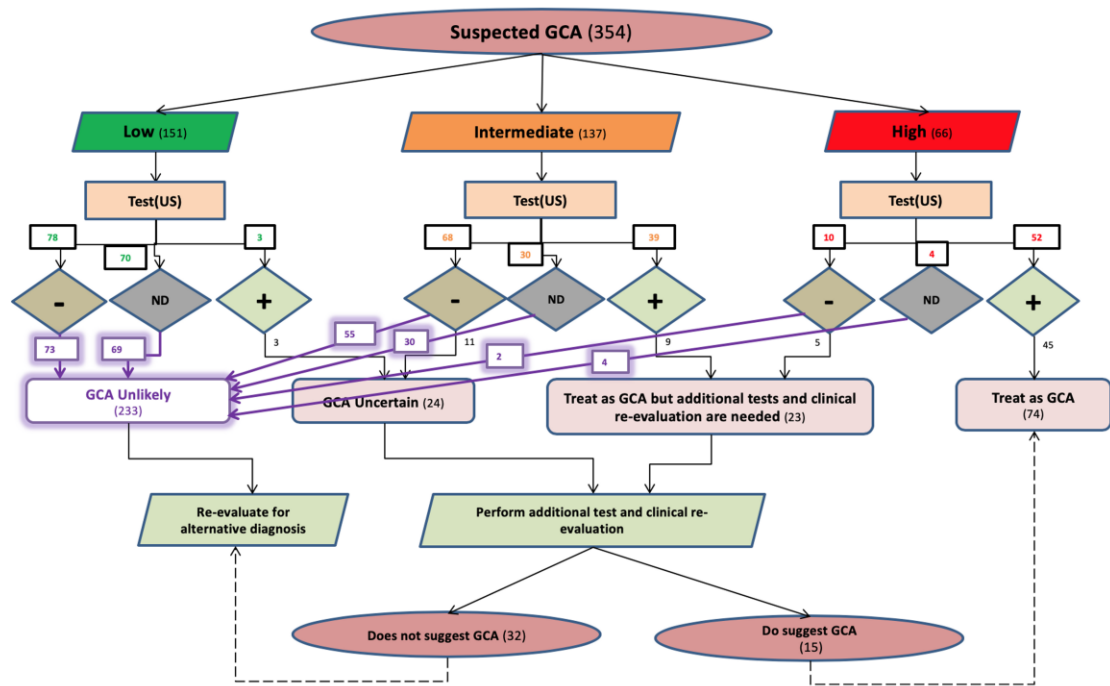

Fig 1

Supplement: rmdopen-2020-001297s001.pdf [file rmdopen-2020-001297s001.pdf]

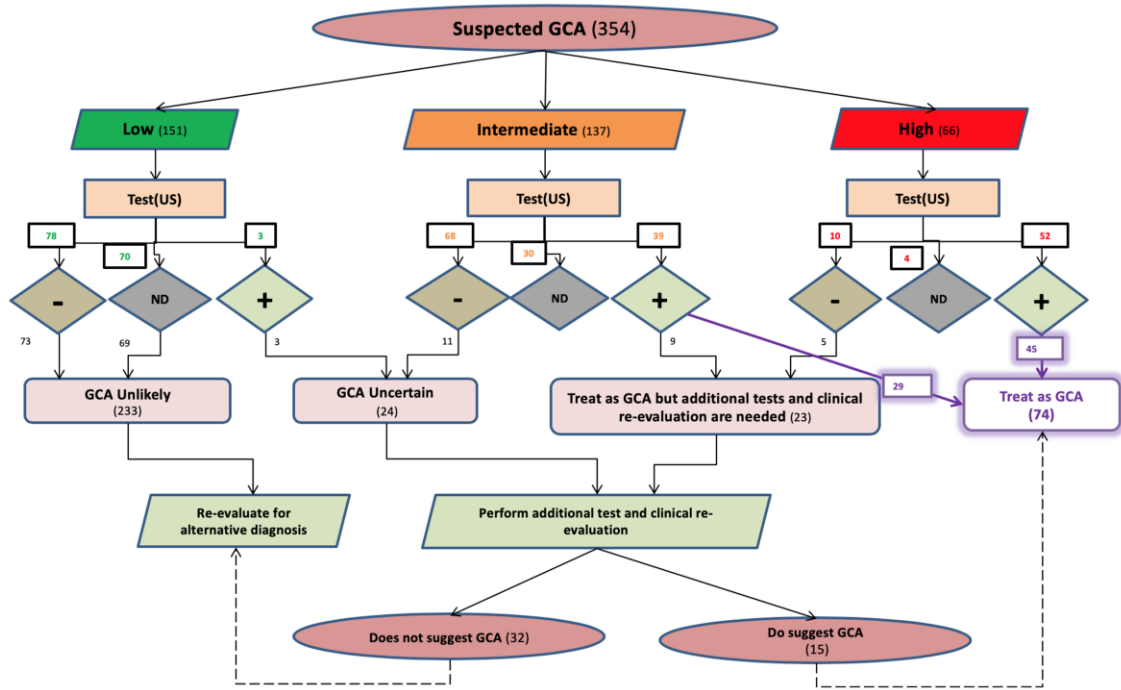

Fig 2

Supplement: rmdopen-2020-001297s002.pdf [file rmdopen-2020-001297s002.pdf]

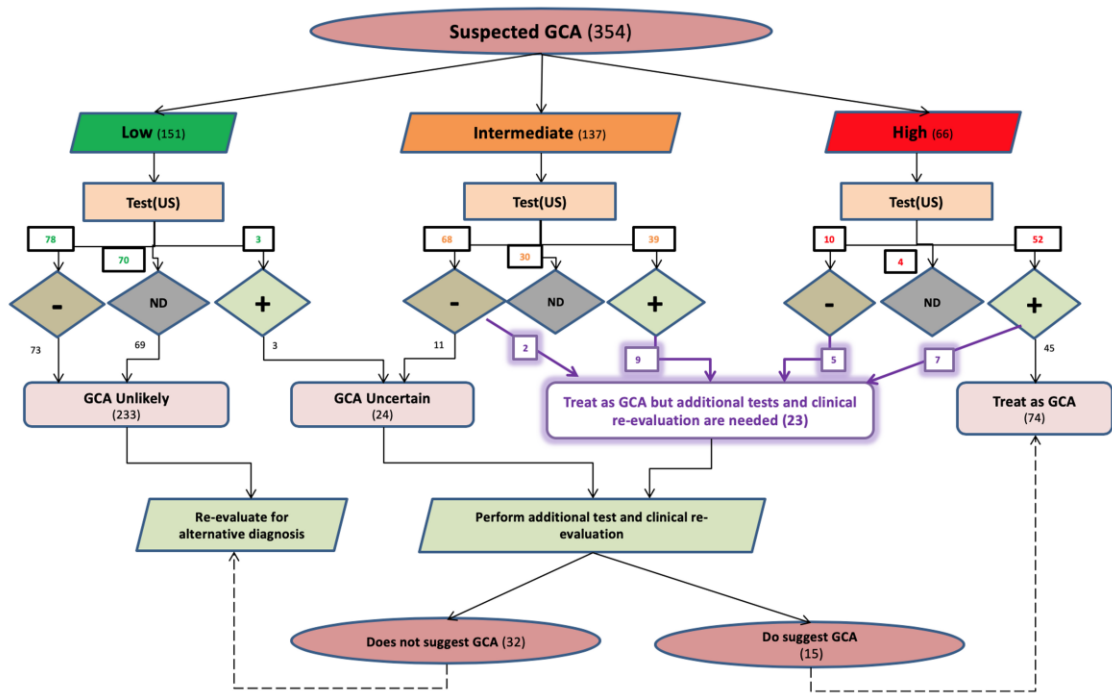

Fig 4

Supplement: rmdopen-2020-001297s004.pdf [file rmdopen-2020-001297s004.pdf]
